# Supplementary material for: Age and aging process alter the gut microbes
Source: Aging (Albany NY). 2024 Apr 8;16(8):6839–51. doi: 10.18632/aging.205728 (PMC11087091; doi:10.18632/aging.205728)
Supplement: Supplementary Table 1 [file aging-16-205728-s001.xlsx]

## Sheet: Sheet1
Supplementary Table 1. The sample ID of CNP0004360 in China National GeneBank DataBase.
# This is a sample template for batch submission of 'Microbe; version 1.0'
# GREEN fields are mandatory. Your submission will fail if any mandatory fields are not completed. If information is unavailable for any mandatory field, please enter 'not collected', 'not applicable' or 'missing' as appropriate.
# BLUE fields indicate that at least one of those fields is mandatory. If information is unavailable, please enter 'not collected', 'not applicable' or 'missing' as appropriate.
# YELLOW fields are optional. Leave optional fields empty (or delete them) if no information is available.
# You can add any number of custom fields to fully describe your samples, simply include them in the table.
# Hover over field name to view definition.
# CAUTION: Be aware that Excel may automatically apply formatting to your data. In particular, take care with dates, incrementing autofills and special characters like / or -. Doublecheck that your text file is accurate before submission.
# TO MAKE A SUBMISSION:
# 1. Complete this template table.
# 2. Upload the file on the 'Attributes' tab of the Sample Submission.
# If you have any questions, please contact us at datasubs@cngb.org.
*sample_name	sample_title	*tax_id	*organism	strain	isolate	sample_accession
741569	741569	408170	human gut metagenome	missing	NC-1	CNS0805056
798302	798302	408170	human gut metagenome	missing	NC-2	CNS0805057
801778	801778	408170	human gut metagenome	missing	NC-3	CNS0805058
883580	883580	408170	human gut metagenome	missing	NC-4	CNS0805059
899754	899754	408170	human gut metagenome	missing	NC-5	CNS0805060
902344	902344	408170	human gut metagenome	missing	NC-6	CNS0805061
907409	907409	408170	human gut metagenome	missing	NC-7	CNS0805062
907484	907484	408170	human gut metagenome	missing	NC-8	CNS0805063
908481	908481	408170	human gut metagenome	missing	NC-9	CNS0805064
911780	911780	408170	human gut metagenome	missing	NC-10	CNS0805065
926221	926221	408170	human gut metagenome	missing	NC-11	CNS0805066
935918	935918	408170	human gut metagenome	missing	NC-12	CNS0805067
936532	936532	408170	human gut metagenome	missing	NC-13	CNS0805068
970399	970399	408170	human gut metagenome	missing	NC-14	CNS0805069
971130	971130	408170	human gut metagenome	missing	NC-15	CNS0805070
976247	976247	408170	human gut metagenome	missing	NC-16	CNS0805071
992716	992716	408170	human gut metagenome	missing	NC-17	CNS0805072
996083	996083	408170	human gut metagenome	missing	NC-18	CNS0805073
996531	996531	408170	human gut metagenome	missing	NC-19	CNS0805074
997774	997774	408170	human gut metagenome	missing	NC-20	CNS0805075
1001281	1001281	408170	human gut metagenome	missing	NC-21	CNS0805076
1009245	1009245	408170	human gut metagenome	missing	NC-22	CNS0805077
1016213	1016213	408170	human gut metagenome	missing	NC-23	CNS0805078
1022386	1022386	408170	human gut metagenome	missing	NC-24	CNS0805079
1024630	1024630	408170	human gut metagenome	missing	NC-25	CNS0805080
1034652	1034652	408170	human gut metagenome	missing	NC-26	CNS0805081
1037304	1037304	408170	human gut metagenome	missing	NC-27	CNS0805082
1043407	1043407	408170	human gut metagenome	missing	NC-28	CNS0805083
1047692	1047692	408170	human gut metagenome	missing	NC-29	CNS0805084
1070601	1070601	408170	human gut metagenome	missing	NC-30	CNS0805085
1071779	1071779	408170	human gut metagenome	missing	NC-31	CNS0805086
1071907	1071907	408170	human gut metagenome	missing	NC-32	CNS0805087
1072398	1072398	408170	human gut metagenome	missing	NC-33	CNS0805088
1095430	1095430	408170	human gut metagenome	missing	NC-34	CNS0805089
1096707	1096707	408170	human gut metagenome	missing	NC-35	CNS0805090
1103339	1103339	408170	human gut metagenome	missing	NC-36	CNS0805091
1104507	1104507	408170	human gut metagenome	missing	NC-37	CNS0805092
1105845	1105845	408170	human gut metagenome	missing	NC-38	CNS0805093
1108494	1108494	408170	human gut metagenome	missing	NC-39	CNS0805094
1112858	1112858	408170	human gut metagenome	missing	NC-40	CNS0805095
1113425	1113425	408170	human gut metagenome	missing	NC-41	CNS0805096
1114520	1114520	408170	human gut metagenome	missing	NC-42	CNS0805097
1124031	1124031	408170	human gut metagenome	missing	NC-43	CNS0805098
1129302	1129302	408170	human gut metagenome	missing	NC-44	CNS0805099
1138560	1138560	408170	human gut metagenome	missing	NC-45	CNS0805100
1143124	1143124	408170	human gut metagenome	missing	NC-46	CNS0805101
1151469	1151469	408170	human gut metagenome	missing	NC-47	CNS0805102
1154663	1154663	408170	human gut metagenome	missing	NC-48	CNS0805103
1154852	1154852	408170	human gut metagenome	missing	NC-49	CNS0805104
1156999	1156999	408170	human gut metagenome	missing	NC-50	CNS0805105
1168740	1168740	408170	human gut metagenome	missing	NC-51	CNS0805106
1171965	1171965	408170	human gut metagenome	missing	NC-52	CNS0805107
1174114	1174114	408170	human gut metagenome	missing	NC-53	CNS0805108
1174385	1174385	408170	human gut metagenome	missing	NC-54	CNS0805109
1176936	1176936	408170	human gut metagenome	missing	NC-55	CNS0805110
1181557	1181557	408170	human gut metagenome	missing	NC-56	CNS0805111
1183131	1183131	408170	human gut metagenome	missing	NC-57	CNS0805112
1194261	1194261	408170	human gut metagenome	missing	NC-58	CNS0805113
1198168	1198168	408170	human gut metagenome	missing	NC-59	CNS0805114
1198188	1198188	408170	human gut metagenome	missing	NC-60	CNS0805115
1200289	1200289	408170	human gut metagenome	missing	NC-61	CNS0805116
1203231	1203231	408170	human gut metagenome	missing	NC-62	CNS0805117
1203310	1203310	408170	human gut metagenome	missing	NC-63	CNS0805118
1219121	1219121	408170	human gut metagenome	missing	NC-64	CNS0805119
1220465	1220465	408170	human gut metagenome	missing	NC-65	CNS0805120
1225030	1225030	408170	human gut metagenome	missing	NC-66	CNS0805121
1229284	1229284	408170	human gut metagenome	missing	NC-67	CNS0805122
1240576	1240576	408170	human gut metagenome	missing	NC-68	CNS0805123
1242838	1242838	408170	human gut metagenome	missing	NC-69	CNS0805124
1245433	1245433	408170	human gut metagenome	missing	NC-70	CNS0805125
1247040	1247040	408170	human gut metagenome	missing	NC-71	CNS0805126
1249812	1249812	408170	human gut metagenome	missing	NC-72	CNS0805127
1257496	1257496	408170	human gut metagenome	missing	NC-73	CNS0805128
1257896	1257896	408170	human gut metagenome	missing	NC-74	CNS0805129
1267432	1267432	408170	human gut metagenome	missing	NC-75	CNS0805130
1270102	1270102	408170	human gut metagenome	missing	NC-76	CNS0805131
1270219	1270219	408170	human gut metagenome	missing	NC-77	CNS0805132
1273066	1273066	408170	human gut metagenome	missing	NC-78	CNS0805133
1276787	1276787	408170	human gut metagenome	missing	NC-79	CNS0805134
1279869	1279869	408170	human gut metagenome	missing	NC-80	CNS0805135
1286338	1286338	408170	human gut metagenome	missing	NC-81	CNS0805136
1308123	1308123	408170	human gut metagenome	missing	NC-82	CNS0805137
1309436	1309436	408170	human gut metagenome	missing	NC-83	CNS0805138
1312217	1312217	408170	human gut metagenome	missing	NC-84	CNS0805139
1315131	1315131	408170	human gut metagenome	missing	NC-85	CNS0805140
1320131	1320131	408170	human gut metagenome	missing	NC-86	CNS0805141
1324311	1324311	408170	human gut metagenome	missing	NC-87	CNS0805142
1819441	1819441	408170	human gut metagenome	missing	NC-88	CNS0805143
2113331	2113331	408170	human gut metagenome	missing	NC-89	CNS0805144
2136015	2136015	408170	human gut metagenome	missing	NC-90	CNS0805145
2167113	2167113	408170	human gut metagenome	missing	NC-91	CNS0805146
2180983	2180983	408170	human gut metagenome	missing	NC-92	CNS0805147
2340330	2340330	408170	human gut metagenome	missing	NC-93	CNS0805148
2416862	2416862	408170	human gut metagenome	missing	NC-94	CNS0805149
2418363	2418363	408170	human gut metagenome	missing	NC-95	CNS0805150
2422286	2422286	408170	human gut metagenome	missing	NC-96	CNS0805151
3699650	3699650	408170	human gut metagenome	missing	NC-97	CNS0805152
4573967	4573967	408170	human gut metagenome	missing	NC-98	CNS0805153
4975810	4975810	408170	human gut metagenome	missing	NC-99	CNS0805154
4990785	4990785	408170	human gut metagenome	missing	NC-100	CNS0805155
5013850	5013850	408170	human gut metagenome	missing	NC-101	CNS0805156
5015483	5015483	408170	human gut metagenome	missing	NC-102	CNS0805157
5209466	5209466	408170	human gut metagenome	missing	NC-103	CNS0805158
5209755	5209755	408170	human gut metagenome	missing	NC-104	CNS0805159
5350542	5350542	408170	human gut metagenome	missing	NC-105	CNS0805160
5357109	5357109	408170	human gut metagenome	missing	NC-106	CNS0805161
5549779	5549779	408170	human gut metagenome	missing	NC-107	CNS0805162
5748216	5748216	408170	human gut metagenome	missing	NC-108	CNS0805163
6088190	6088190	408170	human gut metagenome	missing	NC-109	CNS0805164
6130428	6130428	408170	human gut metagenome	missing	NC-110	CNS0805165
6610035	6610035	408170	human gut metagenome	missing	NC-111	CNS0805166
6733803	6733803	408170	human gut metagenome	missing	NC-112	CNS0805167
6918412	6918412	408170	human gut metagenome	missing	NC-113	CNS0805168
7606461	7606461	408170	human gut metagenome	missing	NC-114	CNS0805169
7634471	7634471	408170	human gut metagenome	missing	NC-115	CNS0805170
7932586	7932586	408170	human gut metagenome	missing	NC-116	CNS0805171
8002777	8002777	408170	human gut metagenome	missing	NC-117	CNS0805172
8084163	8084163	408170	human gut metagenome	missing	NC-118	CNS0805173
8130198	8130198	408170	human gut metagenome	missing	NC-119	CNS0805174
8144629	8144629	408170	human gut metagenome	missing	NC-120	CNS0805175
8300261	8300261	408170	human gut metagenome	missing	NC-121	CNS0805176
8348705	8348705	408170	human gut metagenome	missing	NC-122	CNS0805177
8369099	8369099	408170	human gut metagenome	missing	NC-123	CNS0805178
8415250	8415250	408170	human gut metagenome	missing	NC-124	CNS0805179
9196578	9196578	408170	human gut metagenome	missing	NC-125	CNS0805180
9802811	9802811	408170	human gut metagenome	missing	NC-126	CNS0805181
9971442	9971442	408170	human gut metagenome	missing	NC-127	CNS0805182
10150462	10150462	408170	human gut metagenome	missing	NC-128	CNS0805183
10320783	10320783	408170	human gut metagenome	missing	NC-129	CNS0805184
10538016	10538016	408170	human gut metagenome	missing	NC-130	CNS0805185
10549291	10549291	408170	human gut metagenome	missing	NC-131	CNS0805186
10630713	10630713	408170	human gut metagenome	missing	NC-132	CNS0805187
10722939	10722939	408170	human gut metagenome	missing	NC-133	CNS0805188
10963814	10963814	408170	human gut metagenome	missing	NC-134	CNS0805189
11056935	11056935	408170	human gut metagenome	missing	NC-135	CNS0805190
11315246	11315246	408170	human gut metagenome	missing	NC-136	CNS0805191
11359087	11359087	408170	human gut metagenome	missing	NC-137	CNS0805192
11917413	11917413	408170	human gut metagenome	missing	NC-138	CNS0805193
12431020	12431020	408170	human gut metagenome	missing	NC-139	CNS0805194
12500212	12500212	408170	human gut metagenome	missing	NC-140	CNS0805195
12589636	12589636	408170	human gut metagenome	missing	NC-141	CNS0805196
12672983	12672983	408170	human gut metagenome	missing	NC-142	CNS0805197
13327276	13327276	408170	human gut metagenome	missing	NC-143	CNS0805198
13986991	13986991	408170	human gut metagenome	missing	NC-144	CNS0805199
14781470	14781470	408170	human gut metagenome	missing	NC-145	CNS0805200
14871245	14871245	408170	human gut metagenome	missing	NC-146	CNS0805201
15284018	15284018	408170	human gut metagenome	missing	NC-147	CNS0805202
15813592	15813592	408170	human gut metagenome	missing	NC-148	CNS0805203
15880138	15880138	408170	human gut metagenome	missing	NC-149	CNS0805204
16256072	16256072	408170	human gut metagenome	missing	NC-150	CNS0805205
18226842	18226842	408170	human gut metagenome	missing	NC-151	CNS0805206
30402868	30402868	408170	human gut metagenome	missing	NC-152	CNS0805207
35806816	35806816	408170	human gut metagenome	missing	NC-153	CNS0805208
40305278	40305278	408170	human gut metagenome	missing	NC-154	CNS0805209
54202111	54202111	408170	human gut metagenome	missing	NC-155	CNS0805210
57243252	57243252	408170	human gut metagenome	missing	NC-156	CNS0805211
77774640	77774640	408170	human gut metagenome	missing	NC-157	CNS0805212
90580271	90580271	408170	human gut metagenome	missing	NC-158	CNS0805213
A003131680	A003131680	408170	human gut metagenome	missing	NC-159	CNS0805214
A003418685	A003418685	408170	human gut metagenome	missing	NC-160	CNS0805215
A006259885	A006259885	408170	human gut metagenome	missing	NC-161	CNS0805216
A01254205	A01254205	408170	human gut metagenome	missing	NC-510	CNS0805217
A013607533	A013607533	408170	human gut metagenome	missing	NC-162	CNS0805218
A018441641	A018441641	408170	human gut metagenome	missing	NC-163	CNS0805219
A020444343	A020444343	408170	human gut metagenome	missing	NC-164	CNS0805220
Z010335201	Z010335201	408170	human gut metagenome	missing	NC-165	CNS0805221
Z010847311	Z010847311	408170	human gut metagenome	missing	NC-166	CNS0805222
Z010924221	Z010924221	408170	human gut metagenome	missing	NC-167	CNS0805223
Z0114362X1	Z0114362X1	408170	human gut metagenome	missing	NC-168	CNS0805224
Z01163806	Z01163806	408170	human gut metagenome	missing	NC-169	CNS0805225
Z01174042	Z01174042	408170	human gut metagenome	missing	NC-170	CNS0805226
Z011802281	Z011802281	408170	human gut metagenome	missing	NC-171	CNS0805227
Z011900236	Z011900236	408170	human gut metagenome	missing	NC-172	CNS0805228
Z01197415	Z01197415	408170	human gut metagenome	missing	NC-173	CNS0805229
Z012013291	Z012013291	408170	human gut metagenome	missing	NC-174	CNS0805230
Z012526211	Z012526211	408170	human gut metagenome	missing	NC-175	CNS0805231
Z01270915	Z01270915	408170	human gut metagenome	missing	NC-176	CNS0805232
Z020754281	Z020754281	408170	human gut metagenome	missing	NC-177	CNS0805233
Z020904272	Z020904272	408170	human gut metagenome	missing	NC-178	CNS0805234
Z0210161X1	Z0210161X1	408170	human gut metagenome	missing	NC-179	CNS0805235
Z021422282	Z021422282	408170	human gut metagenome	missing	NC-180	CNS0805236
Z02148222	Z02148222	408170	human gut metagenome	missing	NC-181	CNS0805237
Z02163758	Z02163758	408170	human gut metagenome	missing	NC-182	CNS0805238
Z02177995	Z02177995	408170	human gut metagenome	missing	NC-183	CNS0805239
Z022420162	Z022420162	408170	human gut metagenome	missing	NC-184	CNS0805240
Z02255017	Z02255017	408170	human gut metagenome	missing	NC-185	CNS0805241
Z022608181	Z022608181	408170	human gut metagenome	missing	NC-186	CNS0805242
Z022620161	Z022620161	408170	human gut metagenome	missing	NC-187	CNS0805243
Z02271822	Z02271822	408170	human gut metagenome	missing	NC-188	CNS0805244
Z03031628	Z03031628	408170	human gut metagenome	missing	NC-189	CNS0805245
Z03041144	Z03041144	408170	human gut metagenome	missing	NC-190	CNS0805246
Z03061911	Z03061911	408170	human gut metagenome	missing	NC-191	CNS0805247
Z030713191	Z030713191	408170	human gut metagenome	missing	NC-192	CNS0805248
Z031044162	Z031044162	408170	human gut metagenome	missing	NC-193	CNS0805249
Z03109120	Z03109120	408170	human gut metagenome	missing	NC-194	CNS0805250
Z03138026	Z03138026	408170	human gut metagenome	missing	NC-195	CNS0805251
Z031416661	Z031416661	408170	human gut metagenome	missing	NC-196	CNS0805252
Z03147222	Z03147222	408170	human gut metagenome	missing	NC-197	CNS0805253
Z0319321X1	Z0319321X1	408170	human gut metagenome	missing	NC-198	CNS0805254
Z03197625	Z03197625	408170	human gut metagenome	missing	NC-199	CNS0805255
Z032000253	Z032000253	408170	human gut metagenome	missing	NC-200	CNS0805256
Z03235423	Z03235423	408170	human gut metagenome	missing	NC-201	CNS0805257
Z04032420	Z04032420	408170	human gut metagenome	missing	NC-202	CNS0805258
Z040524171	Z040524171	408170	human gut metagenome	missing	NC-203	CNS0805259
Z0408131X3	Z0408131X3	408170	human gut metagenome	missing	NC-204	CNS0805260
Z04093626	Z04093626	408170	human gut metagenome	missing	NC-205	CNS0805261
Z041000196	Z041000196	408170	human gut metagenome	missing	NC-206	CNS0805262
Z041251252	Z041251252	408170	human gut metagenome	missing	NC-207	CNS0805263
Z0415001X	Z0415001X	408170	human gut metagenome	missing	NC-208	CNS0805264
Z042319271	Z042319271	408170	human gut metagenome	missing	NC-209	CNS0805265
Z0426519X	Z0426519X	408170	human gut metagenome	missing	NC-210	CNS0805266
Z05023318	Z05023318	408170	human gut metagenome	missing	NC-211	CNS0805267
Z050519191	Z050519191	408170	human gut metagenome	missing	NC-212	CNS0805268
Z05090326	Z05090326	408170	human gut metagenome	missing	NC-213	CNS0805269
Z05173645	Z05173645	408170	human gut metagenome	missing	NC-214	CNS0805270
Z05253412	Z05253412	408170	human gut metagenome	missing	NC-215	CNS0805271
Z052536141	Z052536141	408170	human gut metagenome	missing	NC-216	CNS0805272
Z05292820	Z05292820	408170	human gut metagenome	missing	NC-217	CNS0805273
Z060606261	Z060606261	408170	human gut metagenome	missing	NC-218	CNS0805274
Z0607702X	Z0607702X	408170	human gut metagenome	missing	NC-219	CNS0805275
Z06095429	Z06095429	408170	human gut metagenome	missing	NC-220	CNS0805276
Z061364231	Z061364231	408170	human gut metagenome	missing	NC-221	CNS0805277
Z06166221	Z06166221	408170	human gut metagenome	missing	NC-222	CNS0805278
Z06174639	Z06174639	408170	human gut metagenome	missing	NC-223	CNS0805279
Z06194427	Z06194427	408170	human gut metagenome	missing	NC-224	CNS0805280
Z06236423	Z06236423	408170	human gut metagenome	missing	NC-225	CNS0805281
Z06303458	Z06303458	408170	human gut metagenome	missing	NC-226	CNS0805282
Z070465411	Z070465411	408170	human gut metagenome	missing	NC-227	CNS0805283
Z07114221	Z07114221	408170	human gut metagenome	missing	NC-228	CNS0805284
Z0713351X	Z0713351X	408170	human gut metagenome	missing	NC-229	CNS0805285
Z071551141	Z071551141	408170	human gut metagenome	missing	NC-230	CNS0805286
Z07186417	Z07186417	408170	human gut metagenome	missing	NC-231	CNS0805287
Z072910291	Z072910291	408170	human gut metagenome	missing	NC-232	CNS0805288
Z073140131	Z073140131	408170	human gut metagenome	missing	NC-233	CNS0805289
Z080100113	Z080100113	408170	human gut metagenome	missing	NC-234	CNS0805290
Z08059221	Z08059221	408170	human gut metagenome	missing	NC-235	CNS0805291
Z080713151	Z080713151	408170	human gut metagenome	missing	NC-236	CNS0805292
Z08072429	Z08072429	408170	human gut metagenome	missing	NC-237	CNS0805293
Z08090424	Z08090424	408170	human gut metagenome	missing	NC-238	CNS0805294
Z0817621X1	Z0817621X1	408170	human gut metagenome	missing	NC-239	CNS0805295
Z082204231	Z082204231	408170	human gut metagenome	missing	NC-240	CNS0805296
Z082310321	Z082310321	408170	human gut metagenome	missing	NC-241	CNS0805297
Z09013811	Z09013811	408170	human gut metagenome	missing	NC-242	CNS0805298
Z090320281	Z090320281	408170	human gut metagenome	missing	NC-243	CNS0805299
Z09047475	Z09047475	408170	human gut metagenome	missing	NC-244	CNS0805300
Z090480292	Z090480292	408170	human gut metagenome	missing	NC-245	CNS0805301
Z09053311	Z09053311	408170	human gut metagenome	missing	NC-246	CNS0805302
Z090960281	Z090960281	408170	human gut metagenome	missing	NC-247	CNS0805303
Z09171610	Z09171610	408170	human gut metagenome	missing	NC-248	CNS0805304
Z092044281	Z092044281	408170	human gut metagenome	missing	NC-249	CNS0805305
Z09220658	Z09220658	408170	human gut metagenome	missing	NC-250	CNS0805306
Z092213261	Z092213261	408170	human gut metagenome	missing	NC-251	CNS0805307
Z09225427	Z09225427	408170	human gut metagenome	missing	NC-252	CNS0805308
Z09231230	Z09231230	408170	human gut metagenome	missing	NC-253	CNS0805309
Z092900213	Z092900213	408170	human gut metagenome	missing	NC-254	CNS0805310
Z10013632	Z10013632	408170	human gut metagenome	missing	NC-255	CNS0805311
Z10030445	Z10030445	408170	human gut metagenome	missing	NC-256	CNS0805312
Z10032943	Z10032943	408170	human gut metagenome	missing	NC-257	CNS0805313
Z10033019	Z10033019	408170	human gut metagenome	missing	NC-258	CNS0805314
Z10134926	Z10134926	408170	human gut metagenome	missing	NC-259	CNS0805315
Z101353261	Z101353261	408170	human gut metagenome	missing	NC-260	CNS0805316
Z101439551	Z101439551	408170	human gut metagenome	missing	NC-261	CNS0805317
Z10150415	Z10150415	408170	human gut metagenome	missing	NC-262	CNS0805318
Z101520192	Z101520192	408170	human gut metagenome	missing	NC-263	CNS0805319
Z10176033	Z10176033	408170	human gut metagenome	missing	NC-264	CNS0805320
Z101800153	Z101800153	408170	human gut metagenome	missing	NC-265	CNS0805321
Z10180411	Z10180411	408170	human gut metagenome	missing	NC-266	CNS0805322
Z10201017	Z10201017	408170	human gut metagenome	missing	NC-267	CNS0805323
Z102021252	Z102021252	408170	human gut metagenome	missing	NC-268	CNS0805324
Z10210217	Z10210217	408170	human gut metagenome	missing	NC-269	CNS0805325
Z1022002X	Z1022002X	408170	human gut metagenome	missing	NC-270	CNS0805326
Z10231035	Z10231035	408170	human gut metagenome	missing	NC-271	CNS0805327
Z10274440	Z10274440	408170	human gut metagenome	missing	NC-272	CNS0805328
Z10284125	Z10284125	408170	human gut metagenome	missing	NC-273	CNS0805329
Z10288211	Z10288211	408170	human gut metagenome	missing	NC-274	CNS0805330
Z103149451	Z103149451	408170	human gut metagenome	missing	NC-275	CNS0805331
Z10318222	Z10318222	408170	human gut metagenome	missing	NC-276	CNS0805332
Z11038805	Z11038805	408170	human gut metagenome	missing	NC-277	CNS0805333
Z110832171	Z110832171	408170	human gut metagenome	missing	NC-278	CNS0805334
Z11145417	Z11145417	408170	human gut metagenome	missing	NC-279	CNS0805335
Z11151703	Z11151703	408170	human gut metagenome	missing	NC-280	CNS0805336
Z11181523	Z11181523	408170	human gut metagenome	missing	NC-281	CNS0805337
Z11184031	Z11184031	408170	human gut metagenome	missing	NC-282	CNS0805338
Z111878111	Z111878111	408170	human gut metagenome	missing	NC-283	CNS0805339
Z11204758	Z11204758	408170	human gut metagenome	missing	NC-284	CNS0805340
Z11211222	Z11211222	408170	human gut metagenome	missing	NC-285	CNS0805341
Z11231617	Z11231617	408170	human gut metagenome	missing	NC-286	CNS0805342
Z112551101	Z112551101	408170	human gut metagenome	missing	NC-287	CNS0805343
Z11257489	Z11257489	408170	human gut metagenome	missing	NC-288	CNS0805344
Z112904161	Z112904161	408170	human gut metagenome	missing	NC-289	CNS0805345
Z120100851	Z120100851	408170	human gut metagenome	missing	NC-290	CNS0805346
Z12016827	Z12016827	408170	human gut metagenome	missing	NC-291	CNS0805347
Z12046056	Z12046056	408170	human gut metagenome	missing	NC-292	CNS0805348
Z120704401	Z120704401	408170	human gut metagenome	missing	NC-293	CNS0805349
Z12086146	Z12086146	408170	human gut metagenome	missing	NC-294	CNS0805350
Z120876251	Z120876251	408170	human gut metagenome	missing	NC-295	CNS0805351
Z121042254	Z121042254	408170	human gut metagenome	missing	NC-296	CNS0805352
Z12156044	Z12156044	408170	human gut metagenome	missing	NC-297	CNS0805353
Z12246021	Z12246021	408170	human gut metagenome	missing	NC-298	CNS0805354
Z122610232	Z122610232	408170	human gut metagenome	missing	NC-299	CNS0805355
Z12275815	Z12275815	408170	human gut metagenome	missing	NC-300	CNS0805356
Z12276414	Z12276414	408170	human gut metagenome	missing	NC-301	CNS0805357
Z12276913	Z12276913	408170	human gut metagenome	missing	NC-302	CNS0805358
ZZ0009106	ZZ0009106	408170	human gut metagenome	missing	NC-303	CNS0805359
ZZ00698431	ZZ00698431	408170	human gut metagenome	missing	NC-304	CNS0805360
ZZ00723217	ZZ00723217	408170	human gut metagenome	missing	NC-305	CNS0805361
ZZ00735588	ZZ00735588	408170	human gut metagenome	missing	NC-306	CNS0805362
ZZ00743054	ZZ00743054	408170	human gut metagenome	missing	NC-307	CNS0805363
ZZ00851706	ZZ00851706	408170	human gut metagenome	missing	NC-308	CNS0805364
ZZ00852237	ZZ00852237	408170	human gut metagenome	missing	NC-309	CNS0805365
ZZ00857877	ZZ00857877	408170	human gut metagenome	missing	NC-310	CNS0805366
ZZ00860656	ZZ00860656	408170	human gut metagenome	missing	NC-311	CNS0805367
ZZ00863145	ZZ00863145	408170	human gut metagenome	missing	NC-312	CNS0805368
ZZ00864038	ZZ00864038	408170	human gut metagenome	missing	NC-313	CNS0805369
ZZ00865997	ZZ00865997	408170	human gut metagenome	missing	NC-314	CNS0805370
ZZ00866892	ZZ00866892	408170	human gut metagenome	missing	NC-315	CNS0805371
ZZ00867943	ZZ00867943	408170	human gut metagenome	missing	NC-316	CNS0805372
ZZ00878821	ZZ00878821	408170	human gut metagenome	missing	NC-317	CNS0805373
ZZ00878877	ZZ00878877	408170	human gut metagenome	missing	NC-318	CNS0805374
ZZ00879893	ZZ00879893	408170	human gut metagenome	missing	NC-319	CNS0805375
ZZ00881561	ZZ00881561	408170	human gut metagenome	missing	NC-320	CNS0805376
ZZ00885472	ZZ00885472	408170	human gut metagenome	missing	NC-321	CNS0805377
ZZ00889330	ZZ00889330	408170	human gut metagenome	missing	NC-322	CNS0805378
ZZ00889902	ZZ00889902	408170	human gut metagenome	missing	NC-323	CNS0805379
ZZ00890847	ZZ00890847	408170	human gut metagenome	missing	NC-324	CNS0805380
ZZ0252872	ZZ0252872	408170	human gut metagenome	missing	NC-325	CNS0805381
ZZ0264706	ZZ0264706	408170	human gut metagenome	missing	NC-326	CNS0805382
ZZ0277582	ZZ0277582	408170	human gut metagenome	missing	NC-327	CNS0805383
ZZ0352169	ZZ0352169	408170	human gut metagenome	missing	NC-328	CNS0805384
ZZ0466060	ZZ0466060	408170	human gut metagenome	missing	NC-329	CNS0805385
ZZ0597298	ZZ0597298	408170	human gut metagenome	missing	NC-330	CNS0805386
ZZ0624764	ZZ0624764	408170	human gut metagenome	missing	NC-331	CNS0805387
ZZ0633657	ZZ0633657	408170	human gut metagenome	missing	NC-332	CNS0805388
ZZ0683667	ZZ0683667	408170	human gut metagenome	missing	NC-333	CNS0805389
ZZ7097227	ZZ7097227	408170	human gut metagenome	missing	NC-334	CNS0805390
313649	313649	408170	human gut metagenome	missing	NC-335	CNS0805391
1087921	1087921	408170	human gut metagenome	missing	NC-336	CNS0805392
1200856	1200856	408170	human gut metagenome	missing	NC-337	CNS0805393
1215100	1215100	408170	human gut metagenome	missing	NC-338	CNS0805394
1220496	1220496	408170	human gut metagenome	missing	NC-339	CNS0805395
1237844	1237844	408170	human gut metagenome	missing	NC-340	CNS0805396
1254089	1254089	408170	human gut metagenome	missing	NC-341	CNS0805397
1257459	1257459	408170	human gut metagenome	missing	NC-342	CNS0805398
1291893	1291893	408170	human gut metagenome	missing	NC-343	CNS0805399
1292466	1292466	408170	human gut metagenome	missing	NC-344	CNS0805400
1292977	1292977	408170	human gut metagenome	missing	NC-345	CNS0805401
1293419	1293419	408170	human gut metagenome	missing	NC-346	CNS0805402
1294045	1294045	408170	human gut metagenome	missing	NC-347	CNS0805403
1299342	1299342	408170	human gut metagenome	missing	NC-348	CNS0805404
1299652	1299652	408170	human gut metagenome	missing	NC-349	CNS0805405
1299803	1299803	408170	human gut metagenome	missing	NC-350	CNS0805406
1300535	1300535	408170	human gut metagenome	missing	NC-351	CNS0805407
1300623	1300623	408170	human gut metagenome	missing	NC-352	CNS0805408
1301414	1301414	408170	human gut metagenome	missing	NC-353	CNS0805409
1301426	1301426	408170	human gut metagenome	missing	NC-354	CNS0805410
1302163	1302163	408170	human gut metagenome	missing	NC-355	CNS0805411
1303178	1303178	408170	human gut metagenome	missing	NC-356	CNS0805412
1303270	1303270	408170	human gut metagenome	missing	NC-357	CNS0805413
1304539	1304539	408170	human gut metagenome	missing	NC-358	CNS0805414
1304661	1304661	408170	human gut metagenome	missing	NC-359	CNS0805415
1306032	1306032	408170	human gut metagenome	missing	NC-360	CNS0805416
1307217	1307217	408170	human gut metagenome	missing	NC-361	CNS0805417
1308216	1308216	408170	human gut metagenome	missing	NC-362	CNS0805418
1308693	1308693	408170	human gut metagenome	missing	NC-363	CNS0805419
1309307	1309307	408170	human gut metagenome	missing	NC-364	CNS0805420
1309851	1309851	408170	human gut metagenome	missing	NC-365	CNS0805421
1309978	1309978	408170	human gut metagenome	missing	NC-366	CNS0805422
1310179	1310179	408170	human gut metagenome	missing	NC-367	CNS0805423
1310245	1310245	408170	human gut metagenome	missing	NC-368	CNS0805424
1311157	1311157	408170	human gut metagenome	missing	NC-369	CNS0805425
1311416	1311416	408170	human gut metagenome	missing	NC-370	CNS0805426
1312688	1312688	408170	human gut metagenome	missing	NC-371	CNS0805427
1313353	1313353	408170	human gut metagenome	missing	NC-372	CNS0805428
1313454	1313454	408170	human gut metagenome	missing	NC-373	CNS0805429
1314232	1314232	408170	human gut metagenome	missing	NC-374	CNS0805430
1315216	1315216	408170	human gut metagenome	missing	NC-375	CNS0805431
1316130	1316130	408170	human gut metagenome	missing	NC-376	CNS0805432
1316153	1316153	408170	human gut metagenome	missing	NC-377	CNS0805433
1316675	1316675	408170	human gut metagenome	missing	NC-378	CNS0805434
1316871	1316871	408170	human gut metagenome	missing	NC-379	CNS0805435
1319984	1319984	408170	human gut metagenome	missing	NC-380	CNS0805436
1321139	1321139	408170	human gut metagenome	missing	NC-381	CNS0805437
1321576	1321576	408170	human gut metagenome	missing	NC-382	CNS0805438
1321920	1321920	408170	human gut metagenome	missing	NC-383	CNS0805439
1322321	1322321	408170	human gut metagenome	missing	NC-384	CNS0805440
1322326	1322326	408170	human gut metagenome	missing	NC-385	CNS0805441
1322971	1322971	408170	human gut metagenome	missing	NC-386	CNS0805442
1323948	1323948	408170	human gut metagenome	missing	NC-387	CNS0805443
1326295	1326295	408170	human gut metagenome	missing	NC-388	CNS0805444
2202016	2202016	408170	human gut metagenome	missing	NC-389	CNS0805445
2202194	2202194	408170	human gut metagenome	missing	NC-390	CNS0805446
2205990	2205990	408170	human gut metagenome	missing	NC-391	CNS0805447
Z090506211	Z090506211	408170	human gut metagenome	missing	NC-392	CNS0805448
Z112504183	Z112504183	408170	human gut metagenome	missing	NC-393	CNS0805449
Z186218	Z186218	408170	human gut metagenome	missing	NC-394	CNS0805450
Z394985	Z394985	408170	human gut metagenome	missing	NC-395	CNS0805451
1044369	1044369	408170	human gut metagenome	missing	NC-396	CNS0805452
Z112918221	Z112918221	408170	human gut metagenome	missing	NC-397	CNS0805453
1151683	1151683	408170	human gut metagenome	missing	NC-398	CNS0805454
90144668	90144668	408170	human gut metagenome	missing	NC-399	CNS0805455
1190613	1190613	408170	human gut metagenome	missing	NC-400	CNS0805456
1241834	1241834	408170	human gut metagenome	missing	NC-401	CNS0805457
1265886	1265886	408170	human gut metagenome	missing	NC-402	CNS0805458
1278056	1278056	408170	human gut metagenome	missing	NC-403	CNS0805459
2058812	2058812	408170	human gut metagenome	missing	NC-404	CNS0805460
Z07286863	Z07286863	408170	human gut metagenome	missing	NC-405	CNS0805461
ZZ00845069	ZZ00845069	408170	human gut metagenome	missing	NC-406	CNS0805462
ZZ0318218	ZZ0318218	408170	human gut metagenome	missing	NC-407	CNS0805463
ZZ00851267	ZZ00851267	408170	human gut metagenome	missing	NC-408	CNS0805464
Z12203516	Z12203516	408170	human gut metagenome	missing	NC-409	CNS0805465
Z120354111	Z120354111	408170	human gut metagenome	missing	NC-410	CNS0805466
Z1125002X	Z1125002X	408170	human gut metagenome	missing	NC-411	CNS0805467
Z11146621	Z11146621	408170	human gut metagenome	missing	NC-412	CNS0805468
Z11115632	Z11115632	408170	human gut metagenome	missing	NC-413	CNS0805469
Z10283616	Z10283616	408170	human gut metagenome	missing	NC-414	CNS0805470
Z1027806X	Z1027806X	408170	human gut metagenome	missing	NC-415	CNS0805471
Z10257750	Z10257750	408170	human gut metagenome	missing	NC-416	CNS0805472
Z1025174X	Z1025174X	408170	human gut metagenome	missing	NC-417	CNS0805473
Z09214610	Z09214610	408170	human gut metagenome	missing	NC-418	CNS0805474
Z091510261	Z091510261	408170	human gut metagenome	missing	NC-419	CNS0805475
Z090848131	Z090848131	408170	human gut metagenome	missing	NC-420	CNS0805476
Z082926272	Z082926272	408170	human gut metagenome	missing	NC-421	CNS0805477
Z08202613	Z08202613	408170	human gut metagenome	missing	NC-422	CNS0805478
Z08164613	Z08164613	408170	human gut metagenome	missing	NC-423	CNS0805479
Z081603621	Z081603621	408170	human gut metagenome	missing	NC-424	CNS0805480
Z070820161	Z070820161	408170	human gut metagenome	missing	NC-425	CNS0805481
Z0707241X1	Z0707241X1	408170	human gut metagenome	missing	NC-426	CNS0805482
Z07067465	Z07067465	408170	human gut metagenome	missing	NC-427	CNS0805483
Z062734162	Z062734162	408170	human gut metagenome	missing	NC-428	CNS0805484
Z050534111	Z050534111	408170	human gut metagenome	missing	NC-429	CNS0805485
Z04203628	Z04203628	408170	human gut metagenome	missing	NC-430	CNS0805486
Z03278219	Z03278219	408170	human gut metagenome	missing	NC-431	CNS0805487
Z031724231	Z031724231	408170	human gut metagenome	missing	NC-432	CNS0805488
Z02265413	Z02265413	408170	human gut metagenome	missing	NC-433	CNS0805489
Z02152410	Z02152410	408170	human gut metagenome	missing	NC-434	CNS0805490
Z01282045	Z01282045	408170	human gut metagenome	missing	NC-435	CNS0805491
Z01271438	Z01271438	408170	human gut metagenome	missing	NC-436	CNS0805492
S01123249	S01123249	408170	human gut metagenome	missing	NC-437	CNS0805493
S01119304	S01119304	408170	human gut metagenome	missing	NC-438	CNS0805494
S01118193	S01118193	408170	human gut metagenome	missing	NC-439	CNS0805495
S01118188	S01118188	408170	human gut metagenome	missing	NC-440	CNS0805496
S01117265	S01117265	408170	human gut metagenome	missing	NC-441	CNS0805497
S01116052	S01116052	408170	human gut metagenome	missing	NC-442	CNS0805498
S01113902	S01113902	408170	human gut metagenome	missing	NC-443	CNS0805499
S01111888	S01111888	408170	human gut metagenome	missing	NC-444	CNS0805500
S01109810	S01109810	408170	human gut metagenome	missing	NC-445	CNS0805501
S01107764	S01107764	408170	human gut metagenome	missing	NC-446	CNS0805502
S01106495	S01106495	408170	human gut metagenome	missing	NC-447	CNS0805503
S01104015	S01104015	408170	human gut metagenome	missing	NC-448	CNS0805504
S01103908	S01103908	408170	human gut metagenome	missing	NC-449	CNS0805505
A01161137	A01161137	408170	human gut metagenome	missing	NC-450	CNS0805506
A01158787	A01158787	408170	human gut metagenome	missing	NC-451	CNS0805507
A01158349	A01158349	408170	human gut metagenome	missing	NC-452	CNS0805508
A01158193	A01158193	408170	human gut metagenome	missing	NC-453	CNS0805509
A01157743	A01157743	408170	human gut metagenome	missing	NC-454	CNS0805510
A01156657	A01156657	408170	human gut metagenome	missing	NC-455	CNS0805511
A01156161	A01156161	408170	human gut metagenome	missing	NC-456	CNS0805512
A01156024	A01156024	408170	human gut metagenome	missing	NC-457	CNS0805513
A01155243	A01155243	408170	human gut metagenome	missing	NC-458	CNS0805514
A01154421	A01154421	408170	human gut metagenome	missing	NC-459	CNS0805515
A01150278	A01150278	408170	human gut metagenome	missing	NC-460	CNS0805516
A01147746	A01147746	408170	human gut metagenome	missing	NC-461	CNS0805517
A01145280	A01145280	408170	human gut metagenome	missing	NC-462	CNS0805518
A01144070	A01144070	408170	human gut metagenome	missing	NC-463	CNS0805519
A01143219	A01143219	408170	human gut metagenome	missing	NC-464	CNS0805520
15977461	15977461	408170	human gut metagenome	missing	NC-465	CNS0805521
15421792	15421792	408170	human gut metagenome	missing	NC-466	CNS0805522
14529736	14529736	408170	human gut metagenome	missing	NC-467	CNS0805523
11095186	11095186	408170	human gut metagenome	missing	NC-468	CNS0805524
10569078	10569078	408170	human gut metagenome	missing	NC-469	CNS0805525
9464800	9464800	408170	human gut metagenome	missing	NC-470	CNS0805526
9199259	9199259	408170	human gut metagenome	missing	NC-471	CNS0805527
8757719	8757719	408170	human gut metagenome	missing	NC-472	CNS0805528
8582117	8582117	408170	human gut metagenome	missing	NC-473	CNS0805529
7616296	7616296	408170	human gut metagenome	missing	NC-474	CNS0805530
6912779	6912779	408170	human gut metagenome	missing	NC-475	CNS0805531
5202073	5202073	408170	human gut metagenome	missing	NC-476	CNS0805532
5129366	5129366	408170	human gut metagenome	missing	NC-477	CNS0805533
5102851	5102851	408170	human gut metagenome	missing	NC-478	CNS0805534
1841312	1841312	408170	human gut metagenome	missing	NC-479	CNS0805535
1277434	1277434	408170	human gut metagenome	missing	NC-480	CNS0805536
1270832	1270832	408170	human gut metagenome	missing	NC-481	CNS0805537
1268300	1268300	408170	human gut metagenome	missing	NC-482	CNS0805538
1267962	1267962	408170	human gut metagenome	missing	NC-483	CNS0805539
1267912	1267912	408170	human gut metagenome	missing	NC-484	CNS0805540
1263562	1263562	408170	human gut metagenome	missing	NC-485	CNS0805541
1261638	1261638	408170	human gut metagenome	missing	NC-486	CNS0805542
1258588	1258588	408170	human gut metagenome	missing	NC-487	CNS0805543
1255224	1255224	408170	human gut metagenome	missing	NC-488	CNS0805544
1252165	1252165	408170	human gut metagenome	missing	NC-489	CNS0805545
1251324	1251324	408170	human gut metagenome	missing	NC-490	CNS0805546
1250991	1250991	408170	human gut metagenome	missing	NC-491	CNS0805547
1250160	1250160	408170	human gut metagenome	missing	NC-492	CNS0805548
1247239	1247239	408170	human gut metagenome	missing	NC-493	CNS0805549
1233458	1233458	408170	human gut metagenome	missing	NC-494	CNS0805550
1223846	1223846	408170	human gut metagenome	missing	NC-495	CNS0805551
1221071	1221071	408170	human gut metagenome	missing	NC-496	CNS0805552
1219765	1219765	408170	human gut metagenome	missing	NC-497	CNS0805553
1201545	1201545	408170	human gut metagenome	missing	NC-498	CNS0805554
1192821	1192821	408170	human gut metagenome	missing	NC-499	CNS0805555
1180896	1180896	408170	human gut metagenome	missing	NC-500	CNS0805556
1177248	1177248	408170	human gut metagenome	missing	NC-501	CNS0805557
1162181	1162181	408170	human gut metagenome	missing	NC-502	CNS0805558
1149500	1149500	408170	human gut metagenome	missing	NC-503	CNS0805559
1129499	1129499	408170	human gut metagenome	missing	NC-504	CNS0805560
1087754	1087754	408170	human gut metagenome	missing	NC-505	CNS0805561
1043125	1043125	408170	human gut metagenome	missing	NC-506	CNS0805562
981825	981825	408170	human gut metagenome	missing	NC-507	CNS0805563
855559	855559	408170	human gut metagenome	missing	NC-508	CNS0805564
767090	767090	408170	human gut metagenome	missing	NC-509	CNS0805565
